# Supplementary material for: Coordination compounds with subporphyrazine may exist: DFT quantum chemical prediction for M(ii) complexes with a given macrocyclic ligand (M = Ti–Zn)
Source: Royal Society of Chemistry journal article supplement (doi:10.1039/d3nj05181a), 2024-01-01
Supplement: d3nj05181a1.pdf [file d3nj05181a1.pdf]

**Supplementary Materials**

Table S1. The most important bond lengths, bond and non-bond angles in the molecular structures of complexes of [MSP] type, obtained using the DFT M06/TZVP method.

| Structural parameter                                            | 3d-element (M) |              |              |              |              |              |              |              |              |
|-----------------------------------------------------------------|----------------|--------------|--------------|--------------|--------------|--------------|--------------|--------------|--------------|
|                                                                 | Ti             | V            | Cr           | Mn           | Fe           | Co           | Ni           | Cu           | Zn           |
| M–N bond lengths in chelate node MN <sub>3</sub> , pm           |                |              |              |              |              |              |              |              |              |
| M1N2                                                            | 193.2          | 195.6        | 198.3        | 196.5        | 192.0        | 186.7        | 184.9        | 189.5        | 187.4        |
| M1N3                                                            | 194.1          | 195.6        | 189.0        | 196.5        | 192.1        | 189.7        | 184.9        | 182.9        | 187.4        |
| M1N5                                                            | 193.2          | 195.8        | 198.8        | 196.5        | 190.3        | 186.7        | 185.0        | 189.5        | 187.5        |
| C–N bond lengths in 6-numbered chelate rings, pm                |                |              |              |              |              |              |              |              |              |
| N1C1                                                            | 132.1          | 133.5        | 133.5        | 133.5        | 133.4        | 133.2        | 133.4        | 133.4        | 133.5        |
| C1N2                                                            | 138.7          | 136.7        | 136.2        | 136.7        | 136.5        | 137.0        | 136.6        | 136.0        | 136.9        |
| N2C4                                                            | 138.6          | 136.7        | 136.7        | 136.7        | 136.9        | 136.7        | 136.6        | 136.7        | 136.9        |
| C4N6                                                            | 132.6          | 133.5        | 133.5        | 133.5        | 133.3        | 133.4        | 133.4        | 133.4        | 133.5        |
| N6C12                                                           | 133.0          | 133.5        | 133.6        | 133.5        | 133.6        | 133.4        | 133.4        | 133.4        | 133.5        |
| C12N5                                                           | 138.6          | 136.7        | 136.6        | 136.7        | 136.9        | 136.7        | 136.6        | 136.7        | 136.8        |
| N5C9                                                            | 138.6          | 136.7        | 136.2        | 136.7        | 136.9        | 137.0        | 136.6        | 136.0        | 136.8        |
| C9N4                                                            | 132.3          | 133.5        | 133.5        | 133.6        | 133.6        | 133.2        | 133.4        | 133.4        | 133.5        |
| N4C8                                                            | 134.3          | 133.5        | 133.3        | 133.5        | 133.3        | 133.6        | 133.4        | 133.0        | 133.5        |
| C8N3                                                            | 137.9          | 136.7        | 137.3        | 136.7        | 136.8        | 136.4        | 136.6        | 137.4        | 136.9        |
| N3C5                                                            | 137.9          | 136.7        | 137.2        | 136.7        | 136.5        | 136.4        | 136.6        | 137.4        | 136.9        |
| C5N1                                                            | 134.3          | 133.5        | 133.4        | 133.5        | 133.4        | 133.6        | 133.4        | 133.0        | 133.5        |
| C–C bond lengths in 5-numbered non-chelate rings, pm            |                |              |              |              |              |              |              |              |              |
| C1C2                                                            | 144.7          | 144.6        | 144.7        | 144.6        | 144.8        | 144.5        | 144.6        | 144.8        | 144.7        |
| C2C3                                                            | 136.2          | 136.2        | 136.0        | 136.2        | 136.1        | 136.3        | 136.2        | 136.0        | 136.1        |
| C3C4                                                            | 144.3          | 144.6        | 144.9        | 144.6        | 144.8        | 144.5        | 144.6        | 145.1        | 144.7        |
| C5C6                                                            | 142.9          | 144.6        | 144.1        | 144.6        | 144.8        | 144.8        | 144.6        | 143.9        | 144.7        |
| C6C7                                                            | 137.4          | 136.2        | 136.5        | 136.2        | 136.1        | 136.0        | 136.2        | 136.9        | 136.1        |
| C7C8                                                            | 143.0          | 144.6        | 144.1        | 144.6        | 144.8        | 144.8        | 144.6        | 143.9        | 144.7        |
| C9C10                                                           | 144.6          | 144.6        | 144.7        | 144.6        | 144.2        | 144.5        | 144.6        | 144.8        | 144.7        |
| C10C11                                                          | 136.3          | 136.2        | 136.0        | 136.2        | 136.5        | 136.3        | 136.2        | 136.0        | 136.1        |
| C11C12                                                          | 144.2          | 144.6        | 144.9        | 144.6        | 144.2        | 144.5        | 144.6        | 145.1        | 144.7        |
| Bond angles in chelate node MN <sub>3</sub> , deg               |                |              |              |              |              |              |              |              |              |
| N2M1N5                                                          | 85.5           | 82.8         | 85.9         | 85.3         | 87.9         | 88.8         | 90.9         | 95.1         | 94.8         |
| N5M1N3                                                          | 84.2           | 82.8         | 83.1         | 85.3         | 87.9         | 89.5         | 90.9         | 89.2         | 94.8         |
| N3M1N2                                                          | 84.2           | 82.8         | 83.1         | 85.3         | 85.5         | 89.5         | 91.0         | 89.2         | 94.9         |
| Bond angles sum (BAS), deg                                      | <b>253.9</b>   | <b>248.4</b> | <b>252.1</b> | <b>255.9</b> | <b>261.3</b> | <b>267.8</b> | <b>272.8</b> | <b>273.5</b> | <b>284.5</b> |
| Non-bond angles between N atoms in N <sub>3</sub> grouping, deg |                |              |              |              |              |              |              |              |              |
| N2N3N5                                                          | 60.6           | 60.0         | 63.5         | 60.0         | 60.6         | 59.0         | 60.0         | 64.6         | 60.0         |
| N3N5N2                                                          | 59.7           | 60.0         | 58.2         | 60.0         | 58.8         | 60.5         | 60.0         | 57.7         | 60.0         |
| N5N2N3                                                          | 59.7           | 60.0         | 58.3         | 60.0         | 60.6         | 60.5         | 60.0         | 57.7         | 60.0         |
| Non-bond angles sum (NBAS), deg                                 | 180.0          | 180.0        | 180.0        | 180.0        | 180.0        | 180.0        | 180.0        | 180.0        | 180.0        |
| Bond angles in 6-numbered chelate ring (M1N2C1N1C5N3), deg      |                |              |              |              |              |              |              |              |              |
| M1N2C1                                                          | 124.7          | 124.8        | 124.8        | 124.0        | 125.3        | 123.7        | 123.1        | 124.6        | 121.0        |
| N2C1N1                                                          | 124.6          | 124.8        | 124.3        | 125.4        | 125.0        | 125.4        | 125.4        | 124.6        | 126.1        |
| C1N1C5                                                          | 121.7          | 120.3        | 119.9        | 121.4        | 120.7        | 121.3        | 121.0        | 120.3        | 123.1        |
| N1C5N3                                                          | 123.6          | 124.8        | 125.1        | 125.4        | 124.9        | 125.4        | 125.4        | 126.1        | 126.1        |
| C5N3M1                                                          | 125.1          | 124.8        | 125.0        | 124.0        | 125.3        | 123.2        | 123.1        | 123.7        | 121.0        |
| N3M1N2                                                          | 84.2           | 82.8         | 83.1         | 85.3         | 85.5         | 89.5         | 91.0         | 89.2         | 94.9         |
| Bond angles sum (BAS <sup>61</sup> ), deg                       | 703.9          | 702.3        | 702.2        | 705.5        | 706.7        | 708.5        | 709.0        | 708.5        | 712.2        |
| Bond angles in 6-numbered chelate ring (M1N2C4N6C12N5), deg     |                |              |              |              |              |              |              |              |              |
| M1N2C4                                                          | 124.8          | 124.8        | 123.2        | 124.0        | 122.7        | 123.6        | 123.1        | 119.3        | 121.1        |
| N2C4N6                                                          | 124.6          | 124.8        | 125.9        | 125.4        | 125.4        | 124.8        | 125.4        | 126.8        | 126.1        |
| C4N6C12                                                         | 122.2          | 120.3        | 121.9        | 121.4        | 121.5        | 121.1        | 120.9        | 123.2        | 123.1        |
| N6C12N5                                                         | 124.5          | 124.8        | 125.9        | 125.4        | 125.2        | 124.9        | 125.4        | 126.8        | 126.1        |
| C12N5M1                                                         | 124.8          | 124.8        | 123.1        | 124.0        | 123.6        | 123.6        | 123.1        | 119.3        | 121.1        |
| N5M1N2                                                          | 85.5           | 82.8         | 85.9         | 85.3         | 87.9         | 88.8         | 90.9         | 95.1         | 94.8         |
| Bond angles sum (BAS <sup>62</sup> ), deg                       | 706.4          | 702.3        | 705.9        | 705.5        | 706.3        | 706.8        | 708.8        | 710.5        | 712.3        |

| Bond angles in 6-numbered chelate ring (M1N5C9N4C8N3), deg |       |       |       |       |       |       |       |       |       |
|------------------------------------------------------------|-------|-------|-------|-------|-------|-------|-------|-------|-------|
| M1N5C9                                                     | 124.7 | 124.8 | 124.7 | 124.0 | 123.6 | 123.7 | 123.1 | 124.6 | 121.1 |
| N5C9N4                                                     | 124.5 | 124.8 | 124.3 | 125.4 | 125.2 | 125.4 | 125.4 | 124.6 | 126.1 |
| C9N4C8                                                     | 121.7 | 120.3 | 120.0 | 121.4 | 121.5 | 121.3 | 120.9 | 120.3 | 123.1 |
| N4C8N3                                                     | 123.7 | 124.8 | 125.1 | 125.4 | 125.4 | 125.4 | 125.4 | 126.1 | 126.1 |
| C8N3M1                                                     | 124.9 | 124.8 | 125.0 | 124.0 | 122.7 | 123.2 | 123.1 | 123.7 | 121.1 |
| N3M1N5                                                     | 84.2  | 82.8  | 83.1  | 85.3  | 87.9  | 89.5  | 90.9  | 89.2  | 94.8  |
| Bond angles sum (BAS <sup>63</sup> ), deg                  | 703.6 | 702.3 | 702.2 | 705.5 | 706.3 | 708.5 | 708.8 | 708.5 | 712.3 |
| Bond angles in 5-numbered ring (N2C1C2C3C4), deg           |       |       |       |       |       |       |       |       |       |
| N2C1C2                                                     | 106.8 | 107.3 | 107.8 | 107.2 | 107.0 | 106.7 | 106.7 | 107.6 | 106.7 |
| C1C2C3                                                     | 107.4 | 107.2 | 106.8 | 107.2 | 107.3 | 107.4 | 107.3 | 106.7 | 107.3 |
| C2C3C4                                                     | 107.8 | 107.2 | 107.2 | 107.2 | 107.2 | 107.4 | 107.3 | 107.2 | 107.3 |
| C3C4N2                                                     | 106.9 | 107.3 | 107.3 | 107.2 | 107.0 | 106.7 | 106.7 | 106.9 | 106.7 |
| C4N2C1                                                     | 107.4 | 108.3 | 108.0 | 108.2 | 108.6 | 108.8 | 108.8 | 107.9 | 108.4 |
| Bond angles sum (BAS <sup>51</sup> ), deg                  | 536.3 | 537.3 | 537.1 | 537.0 | 537.1 | 537.0 | 536.8 | 536.3 | 536.4 |
| Bond angles in 5-numbered ring (N3C5C6C7C8), deg           |       |       |       |       |       |       |       |       |       |
| N3C5C6                                                     | 107.1 | 107.3 | 106.4 | 107.2 | 107.1 | 107.4 | 106.7 | 105.3 | 106.7 |
| C5C6C7                                                     | 107.5 | 107.2 | 107.6 | 107.2 | 107.3 | 107.0 | 107.3 | 107.9 | 107.3 |
| C6C7C8                                                     | 107.5 | 107.2 | 107.7 | 107.2 | 107.2 | 107.0 | 107.3 | 107.9 | 107.3 |
| C7C8N3                                                     | 107.1 | 107.3 | 106.4 | 107.2 | 107.0 | 107.4 | 106.7 | 105.3 | 106.7 |
| C8N3C5                                                     | 108.2 | 108.3 | 108.3 | 108.2 | 108.6 | 108.0 | 108.8 | 110.2 | 108.4 |
| Bond angles sum (BAS <sup>52</sup> ), deg                  | 537.4 | 537.3 | 537.4 | 537.0 | 537.2 | 536.8 | 536.8 | 536.6 | 536.4 |
| Bond angles in 5-numbered ring (N5C9C10C11C12), deg        |       |       |       |       |       |       |       |       |       |
| N5C9C10                                                    | 106.8 | 107.3 | 107.8 | 107.2 | 107.2 | 106.7 | 106.7 | 107.6 | 106.7 |
| C9C10C11                                                   | 107.3 | 107.2 | 106.8 | 107.2 | 107.2 | 107.4 | 107.3 | 106.7 | 107.3 |
| C10C11C12                                                  | 107.8 | 107.2 | 107.1 | 107.2 | 107.2 | 107.4 | 107.3 | 107.2 | 107.3 |
| C11C12N5                                                   | 106.9 | 107.3 | 107.3 | 107.2 | 107.2 | 106.7 | 106.7 | 106.9 | 106.7 |
| C12N5C9                                                    | 107.5 | 108.3 | 107.9 | 108.2 | 108.1 | 108.8 | 108.8 | 107.9 | 108.4 |
| Bond angles sum (BAS <sup>53</sup> ), deg                  | 536.3 | 537.3 | 536.9 | 537.0 | 536.9 | 537.0 | 536.8 | 536.3 | 536.4 |

Table S2. The most important bond lengths, bond and non-bond angles in the molecular structures of complexes of [MSP] type, obtained using the DFT OPBE/TZVP method.

| Structural parameter                                  | 3d-element (M) |       |       |       |       |       |       |       |       |
|-------------------------------------------------------|----------------|-------|-------|-------|-------|-------|-------|-------|-------|
|                                                       | Ti             | V     | Cr    | Mn    | Fe    | Co    | Ni    | Cu    | Zn    |
| M–N bond lengths in chelate node MN <sub>3</sub> , pm |                |       |       |       |       |       |       |       |       |
| M1N2                                                  | 190.8          | 190.3 | 194.3 | 195.4 | 187.7 | 184.0 | 182.9 | 188.7 | 187.5 |
| M1N3                                                  | 190.8          | 190.3 | 185.9 | 195.4 | 189.0 | 184.0 | 182.9 | 183.2 | 187.5 |
| M1N5                                                  | 190.9          | 190.5 | 194.3 | 195.4 | 189.2 | 184.1 | 182.9 | 188.7 | 187.6 |
| C–N bond lengths in 6-numbered chelate rings, pm      |                |       |       |       |       |       |       |       |       |
| N1C1                                                  | 134.0          | 134.2 | 134.2 | 134.5 | 134.6 | 134.2 | 134.2 | 134.5 | 134.5 |
| C1N2                                                  | 139.0          | 137.7 | 137.0 | 137.2 | 137.6 | 137.5 | 137.2 | 136.6 | 137.3 |
| N2C4                                                  | 139.0          | 137.7 | 137.9 | 137.2 | 137.6 | 137.5 | 137.2 | 137.5 | 137.3 |
| C4N6                                                  | 134.0          | 134.2 | 134.3 | 134.5 | 134.6 | 134.2 | 134.2 | 134.2 | 134.5 |
| N6C12                                                 | 134.0          | 134.2 | 134.3 | 134.5 | 134.1 | 134.2 | 134.2 | 134.2 | 134.5 |
| C12N5                                                 | 139.0          | 137.7 | 137.9 | 137.2 | 137.6 | 137.5 | 137.2 | 137.5 | 137.3 |
| N5C9                                                  | 139.0          | 137.7 | 137.0 | 137.2 | 137.3 | 137.5 | 137.2 | 136.6 | 137.3 |
| C9N4                                                  | 134.0          | 134.2 | 134.2 | 134.5 | 134.3 | 134.2 | 134.2 | 134.5 | 134.5 |
| N4C8                                                  | 134.0          | 134.2 | 134.4 | 134.5 | 134.3 | 134.2 | 134.2 | 134.0 | 134.5 |
| C8N3                                                  | 139.0          | 137.7 | 137.8 | 137.2 | 137.3 | 137.5 | 137.2 | 137.7 | 137.3 |
| N3C5                                                  | 139.0          | 137.7 | 137.8 | 137.2 | 137.6 | 137.5 | 137.2 | 137.8 | 137.3 |
| C5N1                                                  | 134.0          | 134.2 | 134.4 | 134.5 | 134.1 | 134.2 | 134.2 | 133.9 | 134.5 |



| Bond angles in 5-numbered ring (N3C5C6C7C8), deg    |       |       |       |       |       |       |       |       |       |
|-----------------------------------------------------|-------|-------|-------|-------|-------|-------|-------|-------|-------|
| N3C5C6                                              | 106.8 | 107.1 | 106.0 | 107.3 | 107.0 | 106.9 | 106.7 | 105.3 | 106.8 |
| C5C6C7                                              | 107.5 | 107.3 | 107.8 | 107.0 | 107.0 | 107.2 | 107.2 | 107.8 | 107.1 |
| C6C7C8                                              | 107.5 | 107.3 | 107.8 | 107.0 | 107.3 | 107.2 | 107.2 | 107.8 | 107.1 |
| C7C8N3                                              | 106.8 | 107.1 | 106.0 | 107.3 | 107.0 | 106.9 | 106.7 | 105.3 | 106.8 |
| C8N3C5                                              | 107.9 | 108.4 | 110.1 | 108.3 | 108.6 | 108.5 | 108.9 | 110.4 | 108.5 |
| Bond angles sum (BAS <sup>52</sup> ), deg           |       |       |       |       |       |       |       |       |       |
| Bond angles in 5-numbered ring (N5C9C10C11C12), deg |       |       |       |       |       |       |       |       |       |
| N5C9C10                                             | 106.8 | 107.1 | 107.7 | 107.3 | 107.0 | 106.9 | 106.7 | 107.9 | 106.8 |
| C9C10C11                                            | 107.5 | 107.3 | 106.7 | 107.0 | 107.0 | 107.2 | 107.2 | 106.5 | 107.1 |
| C10C11C12                                           | 107.5 | 107.3 | 107.3 | 107.0 | 107.3 | 107.2 | 107.2 | 107.1 | 107.1 |
| C11C12N5                                            | 106.8 | 107.1 | 107.2 | 107.3 | 107.0 | 106.9 | 106.7 | 107.0 | 106.8 |
| C12N5C9                                             | 107.9 | 108.4 | 107.8 | 108.3 | 108.5 | 108.5 | 108.9 | 107.7 | 108.5 |
| Bond angles sum (BAS <sup>53</sup> ), deg           |       |       |       |       |       |       |       |       |       |

Table S3. Electric dipole moments (☉) for [MSP] compounds of various M calculated by DFT B3PW91/TZVP, DFT OPBE/TZVP и DFT M06/TZVP chemical models.

| DFT method  | Ti   | V    | Cr   | Mn   | Fe   | Co   | Ni   | Cu   | Zn   |
|-------------|------|------|------|------|------|------|------|------|------|
| B3PW91/TZVP | 4.59 | 3.02 | 2.72 | 3.12 | 2.65 | 2.07 | 1.61 | 1.12 | 1.73 |
| OPBE/TZVP   | 4.81 | 2.28 | 2.22 | 2.73 | 2.16 | 1.64 | 1.14 | 0.89 | 1.70 |
| M06/TZVP    | 5.02 | 3.63 | 2.88 | 3.08 | 2.61 | 1.86 | 1.43 | 0.98 | 1.64 |

Table S4. Energy distances between the ground and nearest excited states with spin multiplicity different from the multiplicity of the ground state for various [MSP] complexes in the framework of various versions of the DFT method.

| Complex | DFT method  | $\Delta E$ , kJ/mol |       |       |       |       |       |
|---------|-------------|---------------------|-------|-------|-------|-------|-------|
|         |             | M = 1               | M = 2 | M = 3 | M = 4 | M = 5 | M = 6 |
| [TiSP]  | B3PW91/TZVP | 78.7                | -     | 0.0   | -     | -     | -     |
|         | M06/TZVP    | 23.1                | -     | 0.0   | -     | -     | -     |
|         | OPBE/TZVP   | 43.0                | -     | 0.0   | -     | -     | -     |
| [VSP]   | B3PW91/TZVP | -                   | 81.8  | -     | 0.0   | -     | -     |
|         | M06/TZVP    | -                   | 95.3  | -     | 0.0   | -     | -     |
|         | OPBE/TZVP   | -                   | 60.6  | -     | 0.0   | -     | -     |
| [CrSP]  | B3PW91/TZVP | 233.6               | -     | 49.2  | -     | 0.0   | -     |
|         | M06/TZVP    | 279.3               | -     | 71.2  | -     | 0.0   | -     |
|         | OPBE/TZVP   | 107.2               | -     | 15.5  | -     | 0.0   | -     |
| [MnSP]  | B3PW91/TZVP | -                   | 146.2 | -     | 127.1 | -     | 0.0   |
|         | M06/TZVP    | -                   | 211.9 | -     | 139.7 | -     | 0.0   |
|         | OPBE/TZVP   | -                   | 95.8  | -     | 98.0  | -     | 0.0   |
| [FeSP]  | B3PW91/TZVP | 57.4                | -     | 81.4  | -     | 0.0   | -     |
|         | M06/TZVP    | 82.7                | -     | 100.8 | -     | 0.0   | -     |
|         | OPBE/TZVP   | 17.0                | -     | 36.7  | -     | 0.0   | -     |
| [CoSP]  | B3PW91/TZVP | -                   | 39.2  | -     | 0.0   | -     | 156.2 |
|         | M06/TZVP    | -                   | 28.9  | -     | 0.0   | -     | 146.7 |
|         | OPBE/TZVP   | -                   | 12.7  | -     | 0.0   | -     | 160.5 |
| [NiSP]  | B3PW91/TZVP | 123.1               | -     | 0.0   | -     | -     | -     |
|         | M06/TZVP    | 106.6               | -     | 0.0   | -     | -     | -     |
|         | OPBE/TZVP   | 76.7                | -     | 0.0   | -     | -     | -     |
| [CuSP]  | B3PW91/TZVP | -                   | 0.0   | -     | 148.9 | -     | -     |
|         | M06/TZVP    | -                   | 0.0   | -     | 140.6 | -     | -     |
|         | OPBE/TZVP   | -                   | 0.0   | -     | 115.2 | -     | -     |

|        |             |     |   |       |   |   |   |
|--------|-------------|-----|---|-------|---|---|---|
| [ZnSP] | B3PW91/TZVP | 0.0 | - | 150.9 | - | - | - |
|        | M06/TZVP    | 0.0 | - | 142.5 | - | - | - |
|        | OPBE/TZVP   | 0.0 | - | 162.2 | - | - | - |

Table S5. NBO analysis data for the [MSP] compounds calculated by the DFT OPBE/TZVP method.

| Complex | Effective charge on atom, in electron charge units ( $\bar{e}$ ) |         |         |         |         |         |         | $\langle S^{*2} \rangle$ |
|---------|------------------------------------------------------------------|---------|---------|---------|---------|---------|---------|--------------------------|
|         | M1                                                               | N1      | N2      | N3      | N4      | N5      | N6      |                          |
| [TiSP]  | +1.1298                                                          | -0.3850 | -0.5382 | -0.5382 | -0.3849 | -0.5380 | -0.3849 | 2.0002                   |
| [VSP]   | +0.8762                                                          | -0.3844 | -0.5084 | -0.5084 | -0.3844 | -0.5084 | -0.3844 | 3.7503                   |
| [CrSP]  | +0.9720                                                          | -0.3844 | -0.5661 | -0.4944 | -0.3844 | -0.5660 | -0.3844 | 6.0007                   |
| [MnSP]  | +1.1443                                                          | -0.3892 | -0.6021 | -0.6021 | -0.3891 | -0.6021 | -0.3891 | 8.7501                   |
| [FeSP]  | +1.0125                                                          | -0.3848 | -0.5593 | -0.5611 | -0.3797 | -0.5610 | -0.3848 | 6.0003                   |
| [CoSP]  | +0.8973                                                          | -0.3782 | -0.5228 | -0.5228 | -0.3781 | -0.3781 | -0.5228 | 3.7502                   |
| [NiSP]  | +0.8690                                                          | -0.3862 | -0.5224 | -0.5224 | -0.3860 | -0.5223 | -0.3860 | 2.0000                   |
| [CuSP]  | +0.9319                                                          | -0.3826 | -0.5754 | -0.4972 | -0.3827 | -0.5760 | -0.3955 | 0.7500                   |
| [ZnSP]  | +1.2766                                                          | -0.3946 | -0.6579 | -0.6579 | -0.3945 | -0.6576 | -0.3945 | 0.0000                   |

Table S6. NBO analysis data for the [MSP] compounds calculated by the DFT M06/TZVP method.

| Complex | Effective charge on atom, in electron charge units ( $\bar{e}$ ) |         |         |         |         |         |         | $\langle S^{*2} \rangle$ |
|---------|------------------------------------------------------------------|---------|---------|---------|---------|---------|---------|--------------------------|
|         | M1                                                               | N1      | N2      | N3      | N4      | N5      | N6      |                          |
| [TiSP]  | +1.2081                                                          | -0.4330 | -0.6159 | -0.6033 | -0.4350 | -0.6151 | -0.4283 | 2.0001                   |
| [VSP]   | +1.0229                                                          | -0.4385 | -0.5943 | -0.5943 | -0.4388 | -0.5944 | -0.4388 | 3.7501                   |
| [CrSP]  | +1.0742                                                          | -0.4346 | -0.6429 | -0.5839 | -0.4342 | -0.6433 | -0.4452 | 6.0002                   |
| [MnSP]  | +1.2299                                                          | -0.4409 | -0.6719 | -0.6719 | -0.4409 | -0.6719 | -0.4409 | 8.7500                   |
| [FeSP]  | +1.1194                                                          | -0.4339 | -0.6377 | -0.6375 | -0.4366 | -0.6372 | -0.4365 | 6.0002                   |
| [CoSP]  | +1.0215                                                          | -0.4353 | -0.6144 | -0.6074 | -0.4355 | -0.6144 | -0.4306 | 3.7502                   |
| [NiSP]  | +0.9639                                                          | -0.4360 | -0.5971 | -0.5971 | -0.4359 | -0.5970 | -0.4359 | 2.0000                   |
| [CuSP]  | +0.9536                                                          | -0.4309 | -0.6285 | -0.5409 | -0.4309 | -0.6286 | -0.4471 | 0.7500                   |
| [ZnSP]  | +1.2579                                                          | -0.4434 | -0.6972 | -0.6972 | -0.4433 | -0.6971 | -0.4433 | 0.0000                   |

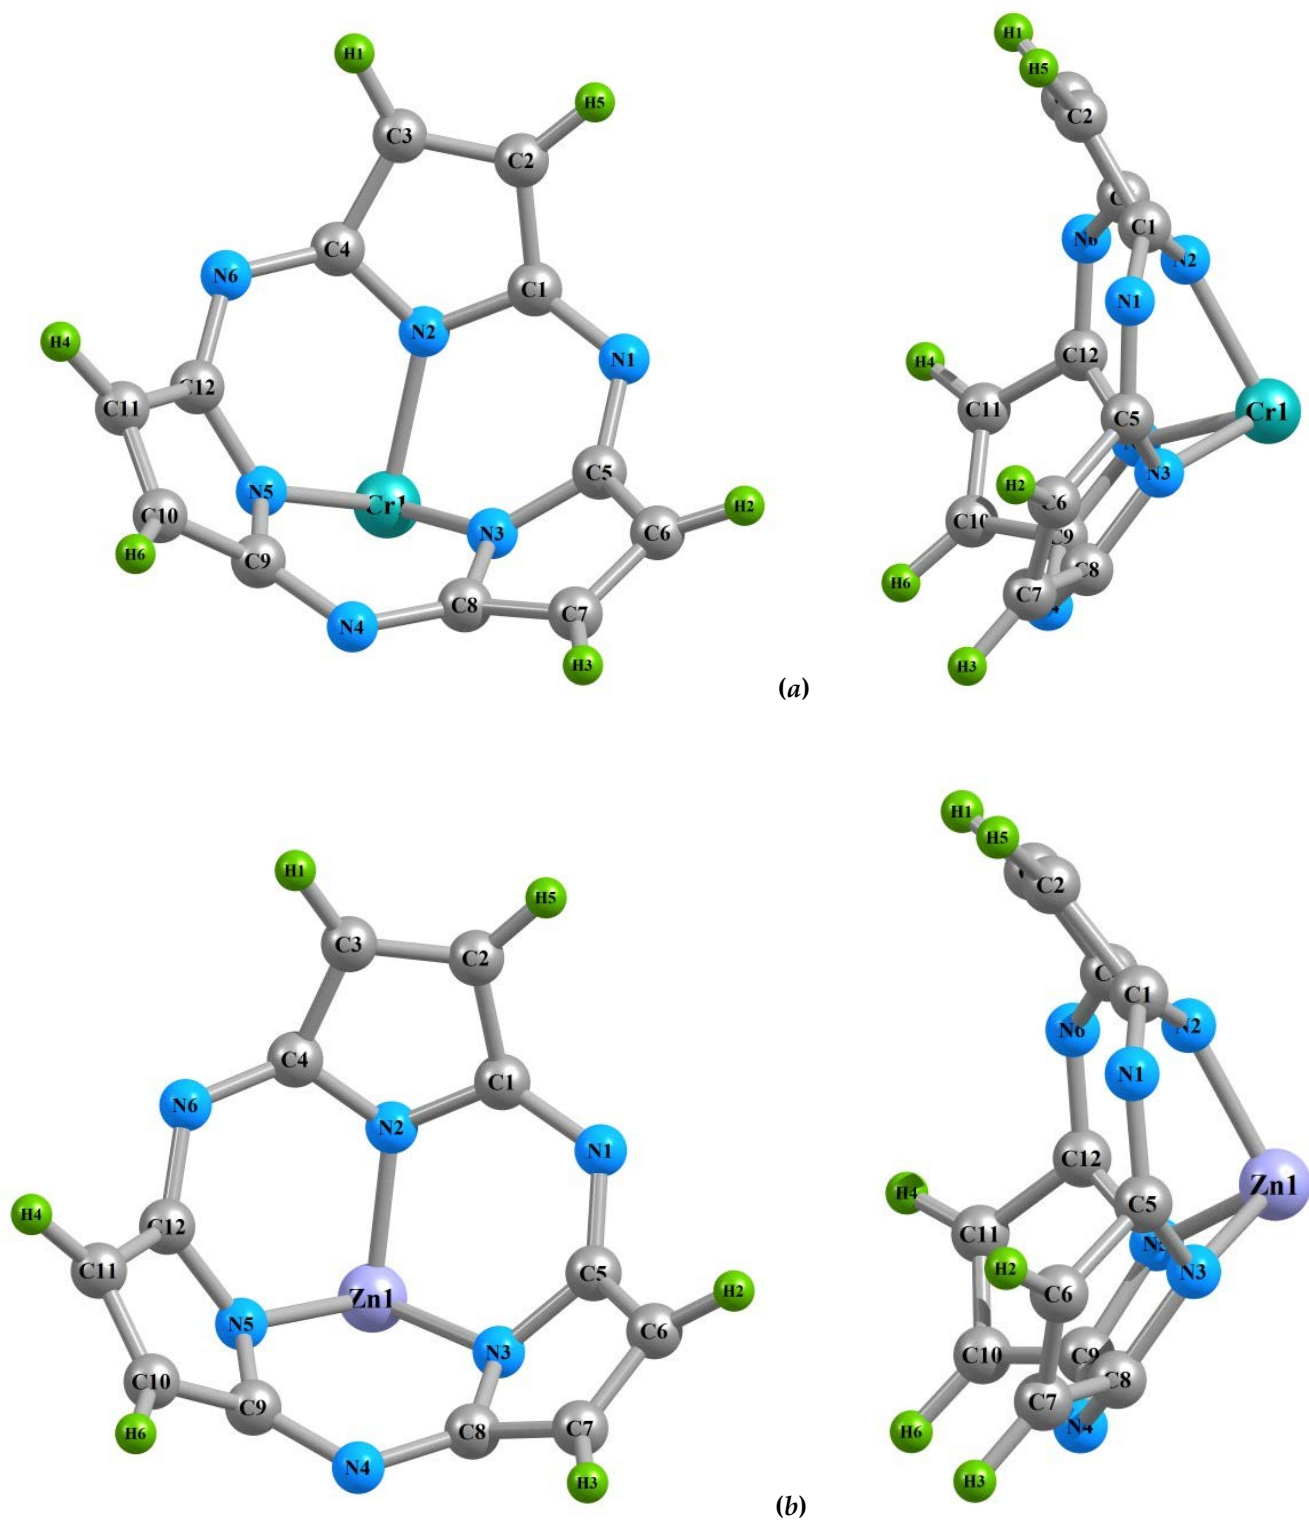

**Fig. S1.** The images of molecular structures of the complexes with subporphyrzine obtained by using quantum-chemical calculation by DFT M06/TZVP method: *a*: [CrSP], *b*: [ZnSP] (*left* – front view, *right* – side view).

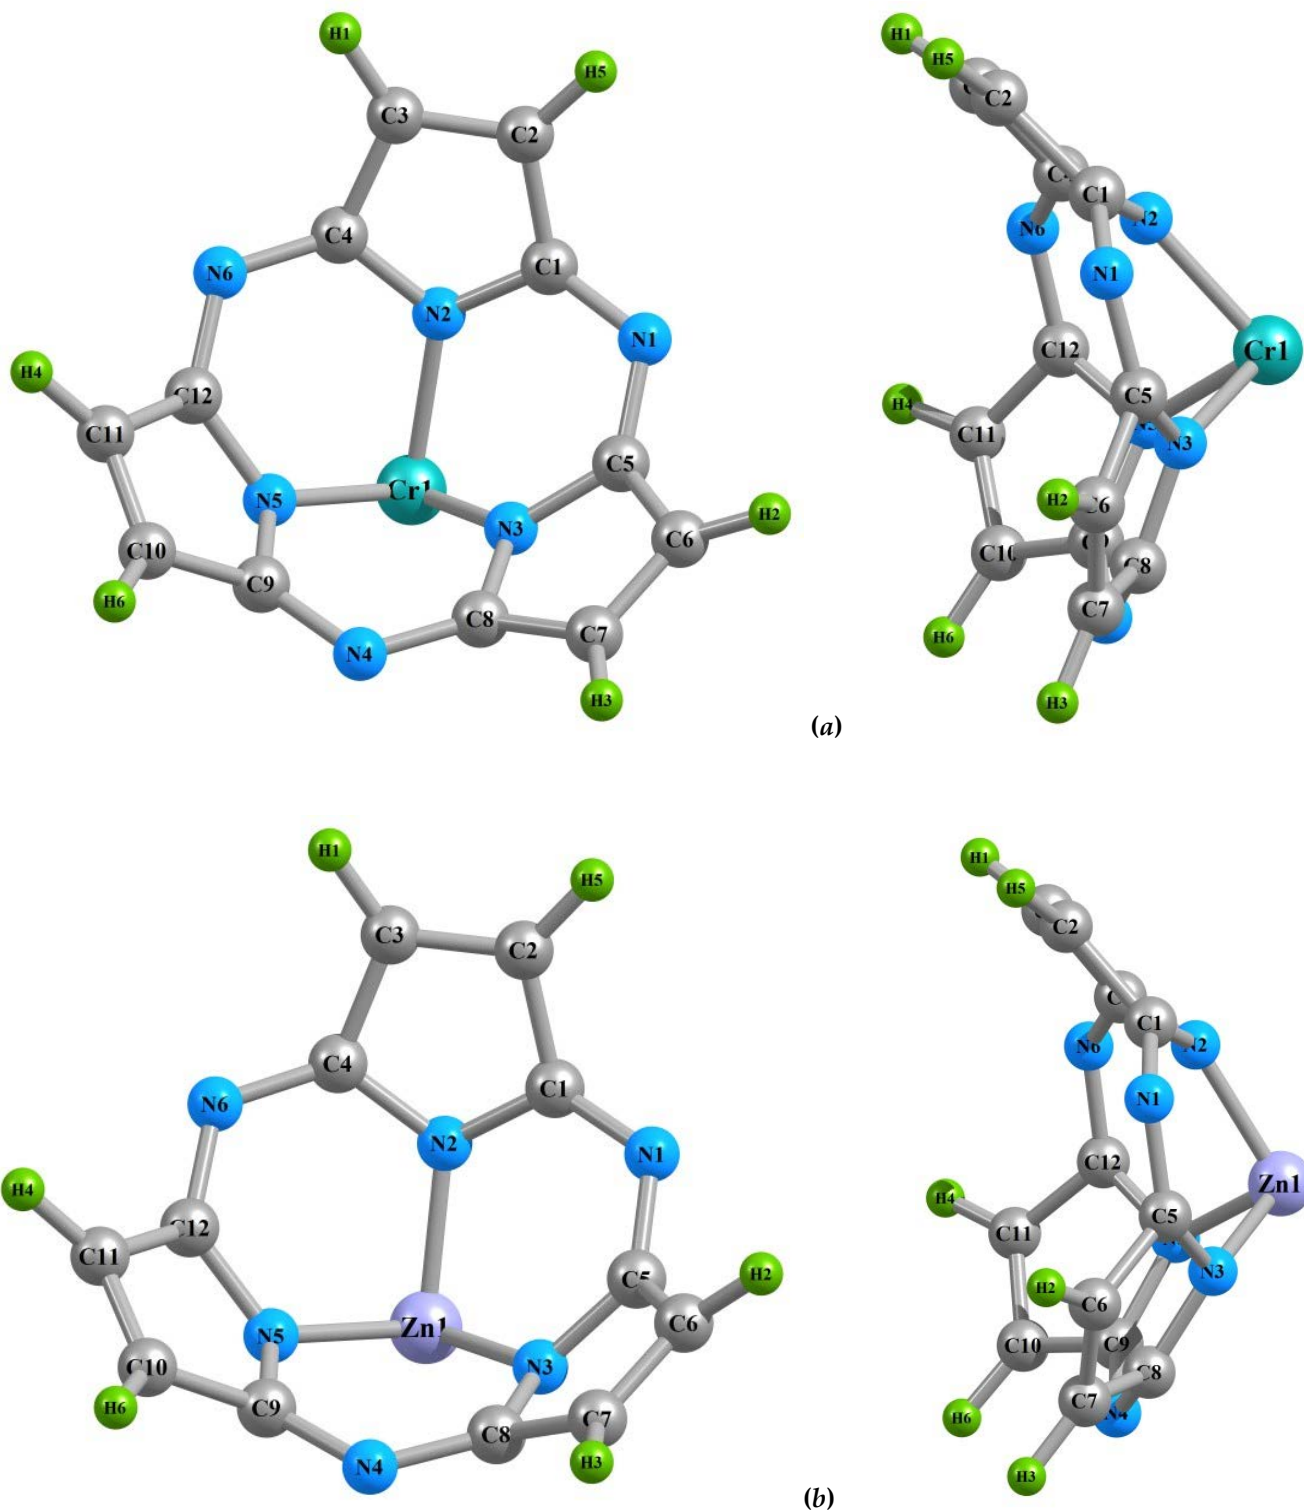

**Fig. S2.** The images of molecular structures of the complexes with subporphyrzine obtained by using quantum-chemical calculation by DFT OPBE/TZVP method: *a*: [CrSP], *b*: [ZnSP] (*left* – front view, *right* – side view).

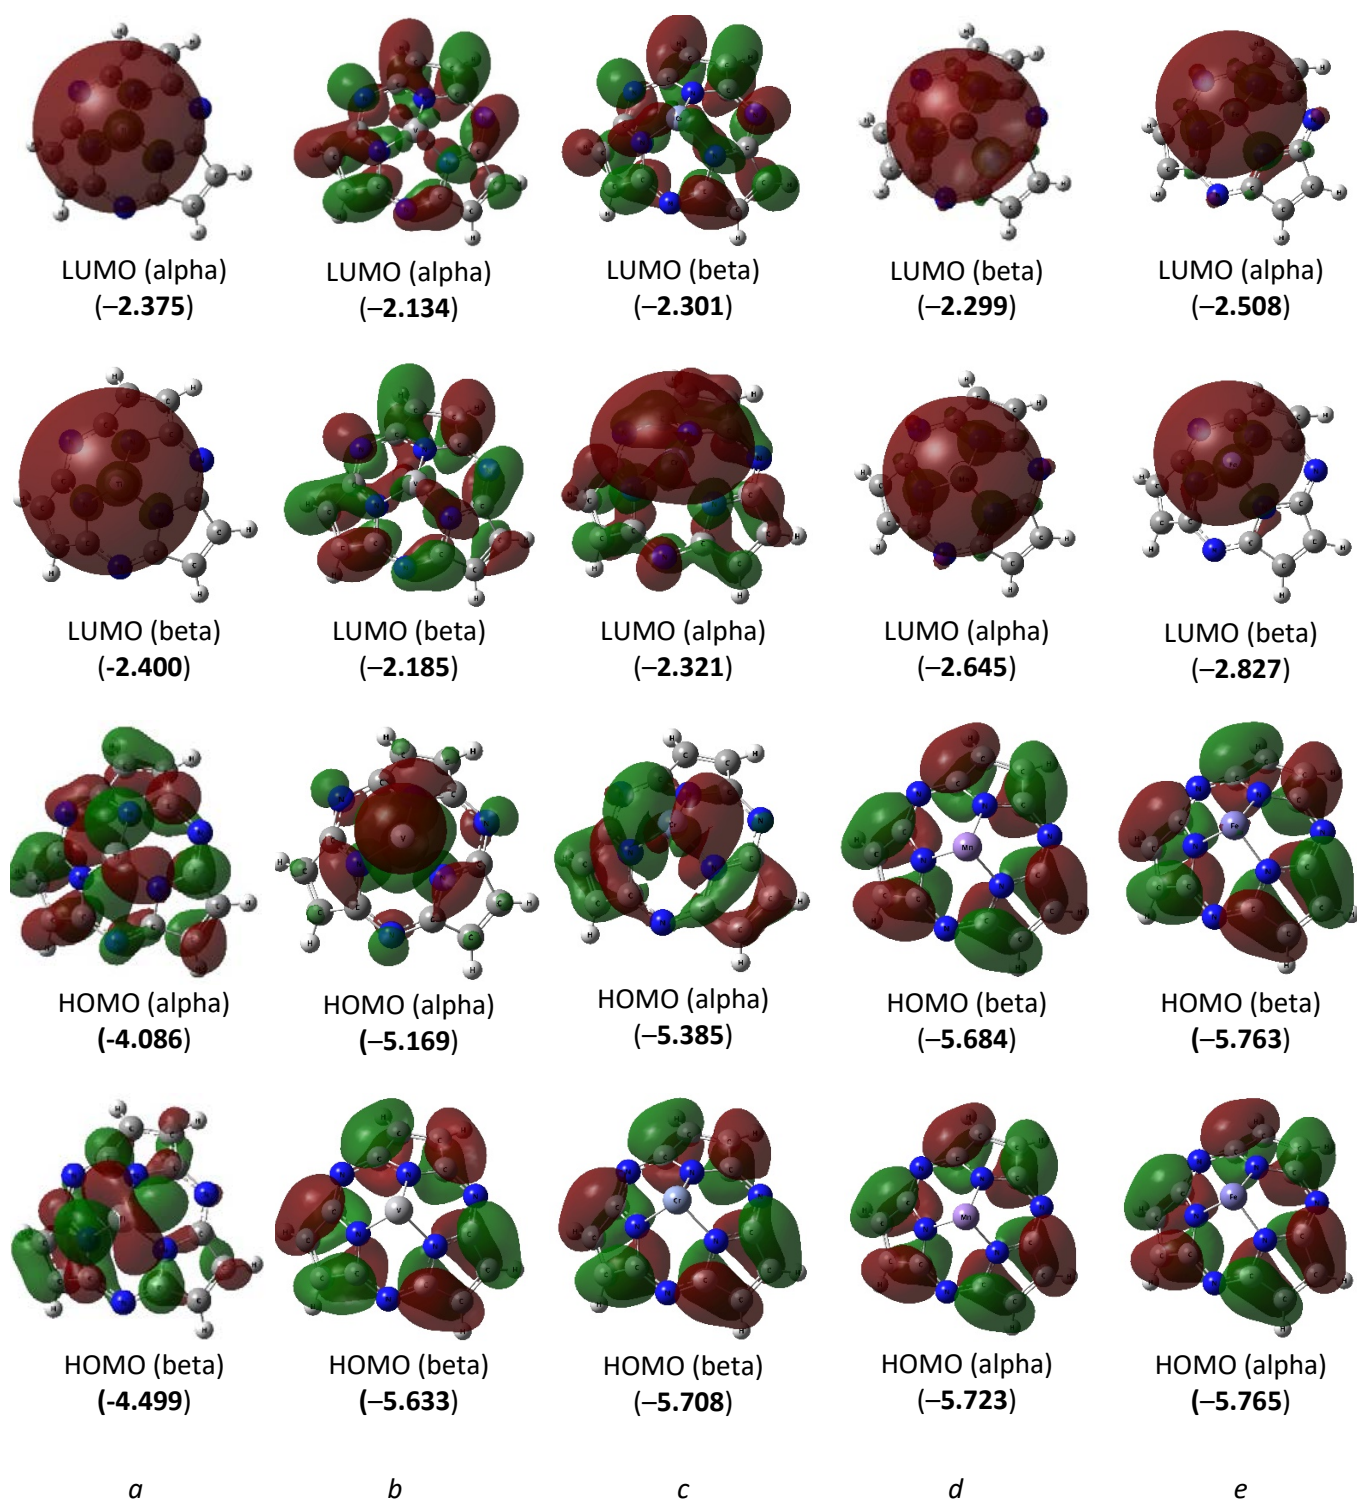

**Fig. S3, A.** Images of the highest occupied (HOMO) and lowest vacant (LUMO) molecular orbitals of complexes [TiSP] with  $M = 3$  (*a*), [VSP] with  $M = 4$  (*b*), [CrSP] with  $M = 5$  (*c*), [MnSP] with  $M = 6$  (*d*) and [FeSP] with  $M = 5$  (*e*) obtained within the DFT M06/TZVP method. The energies values of the given MOs (in brackets) are expressed in eV. The symbol “alpha” belongs to electron having spin (+1/2), symbol “beta”, to electron having spin (-1/2).



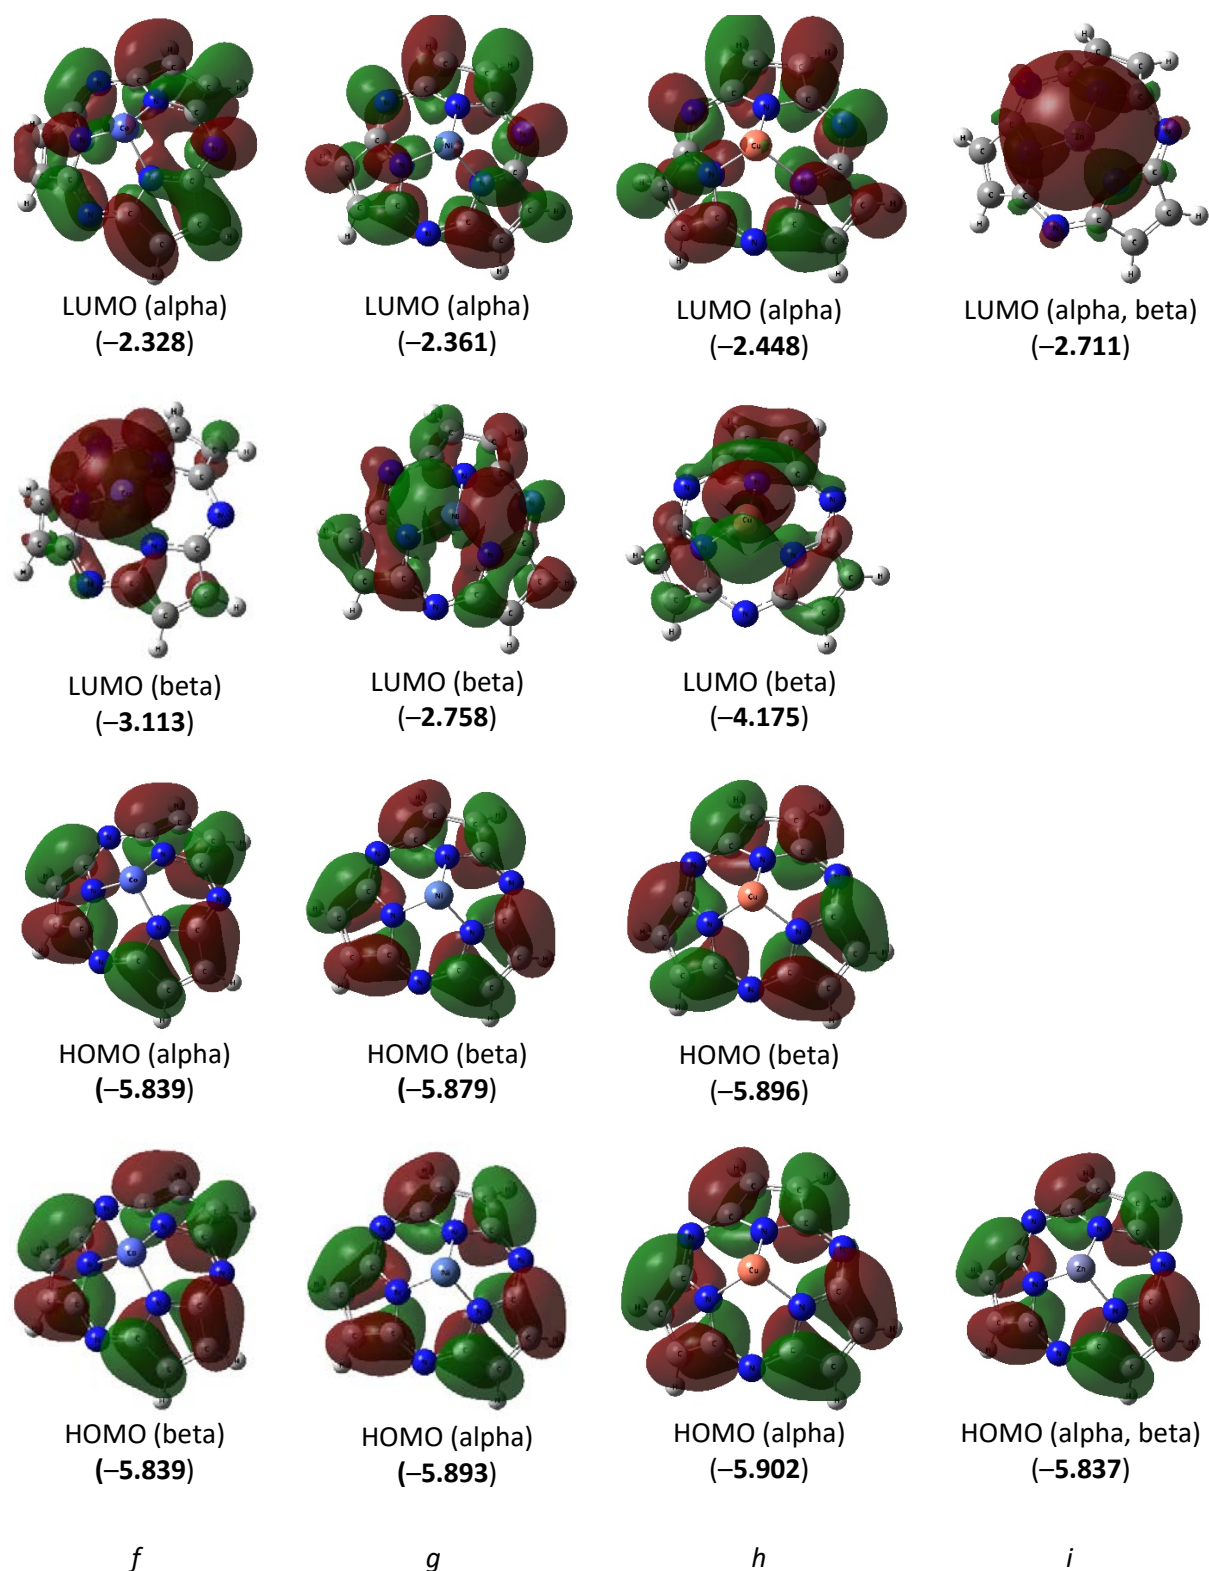

**Fig. S3, B.** Images of the highest occupied (HOMO) and lowest vacant (LUMO) molecular orbitals of complexes [CoSP] with  $M = 4$  (*f*), [NiSP] with  $M = 3$  (*g*), [CuSP] with  $M = 2$  (*h*), and [ZnSP] with  $M = 1$  (*i*) obtained within the DFT M06/TZVP method. The energies values of the given MOs (in brackets) are expressed in eV. The symbol “alpha” belongs to electron having spin (+1/2), symbol “beta”, to electron having spin (-1/2).

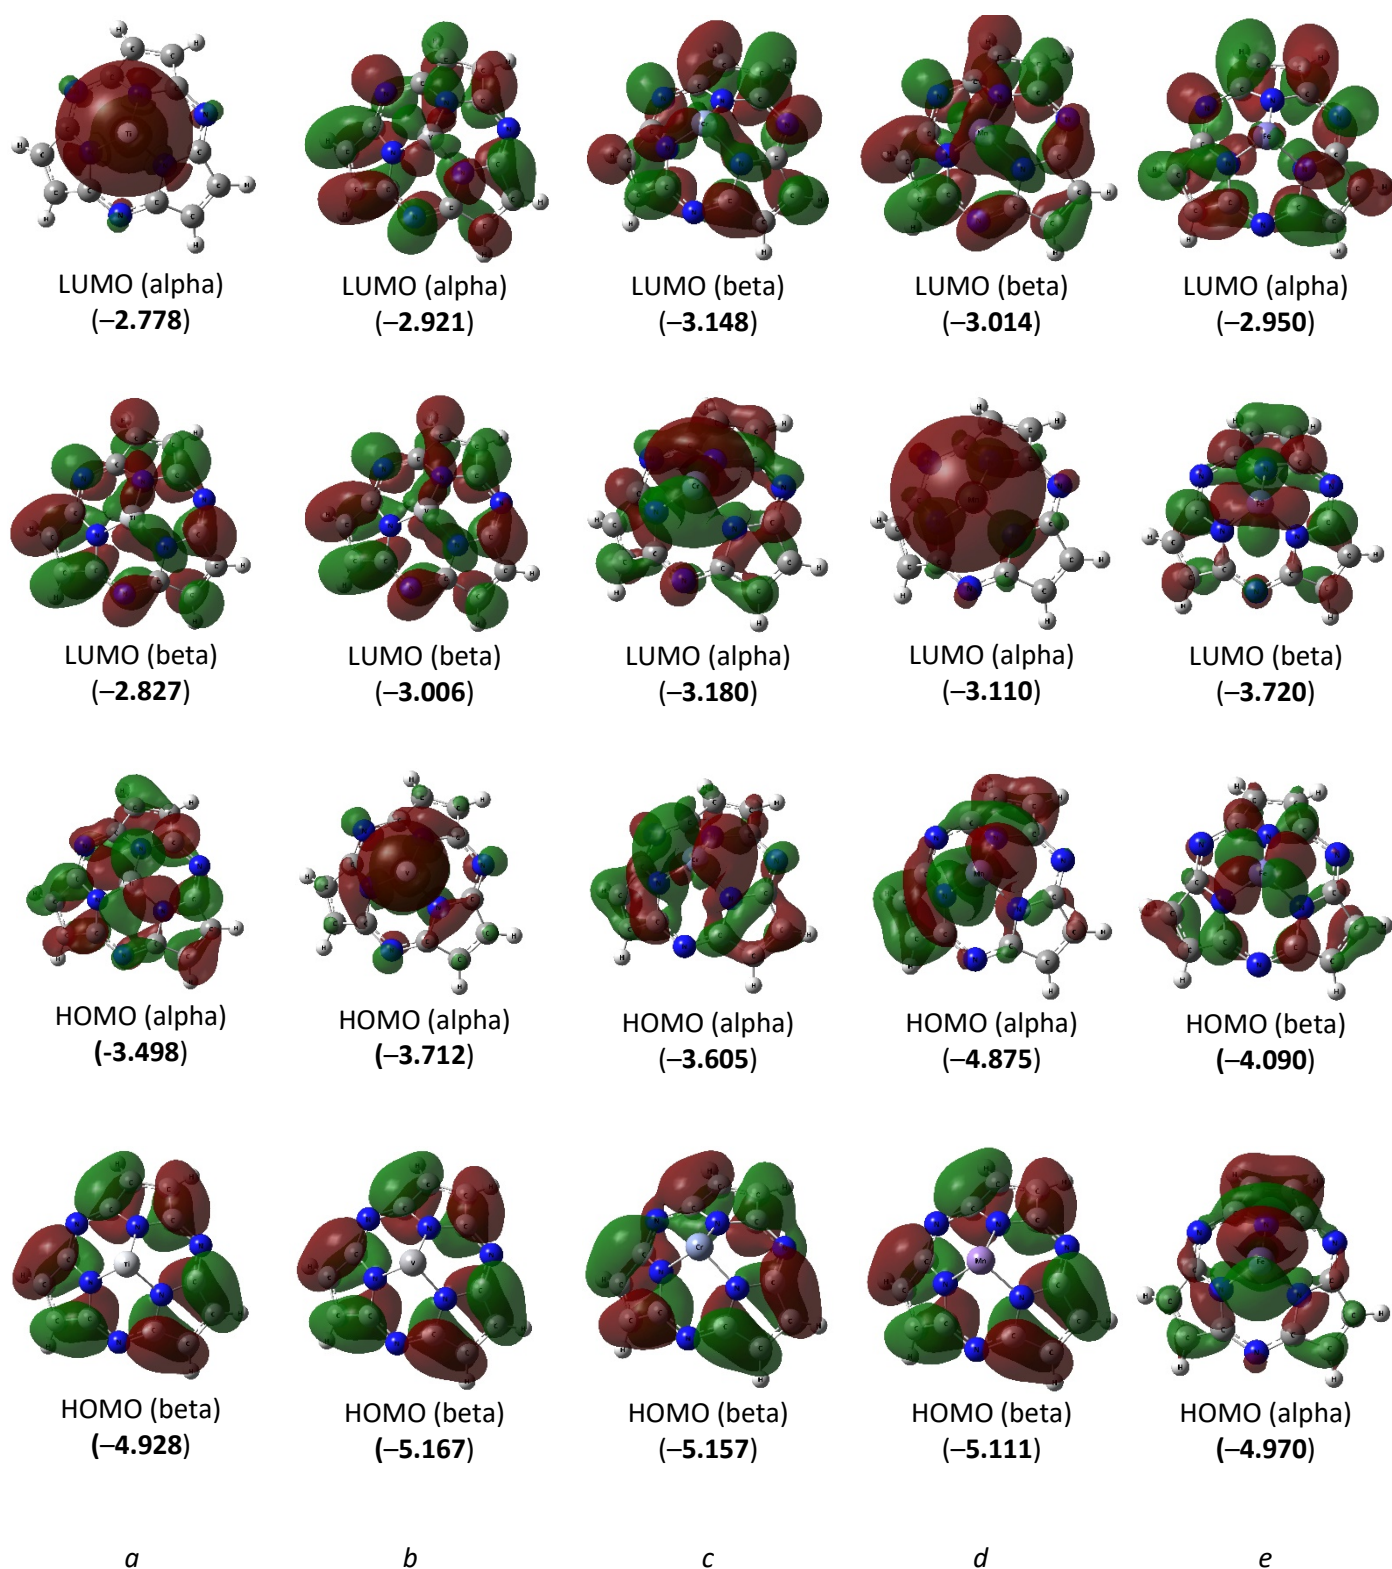

**Fig. S4, A.** Images of the highest occupied (HOMO) and lowest vacant (LUMO) molecular orbitals of complexes [TiSP] with  $M = 3$  (*a*), [VSP] with  $M = 4$  (*b*), [CrSP] with  $M = 5$  (*c*), [MnSP] with  $M = 6$  (*d*) and [FeSP] with  $M = 5$  (*e*) obtained within the DFT OPBE/TZVP method. The energies values of the given MOs (in brackets) are expressed in eV. The symbol “alpha” belongs to electron having spin (+1/2), symbol “beta”, to electron having spin (-1/2).

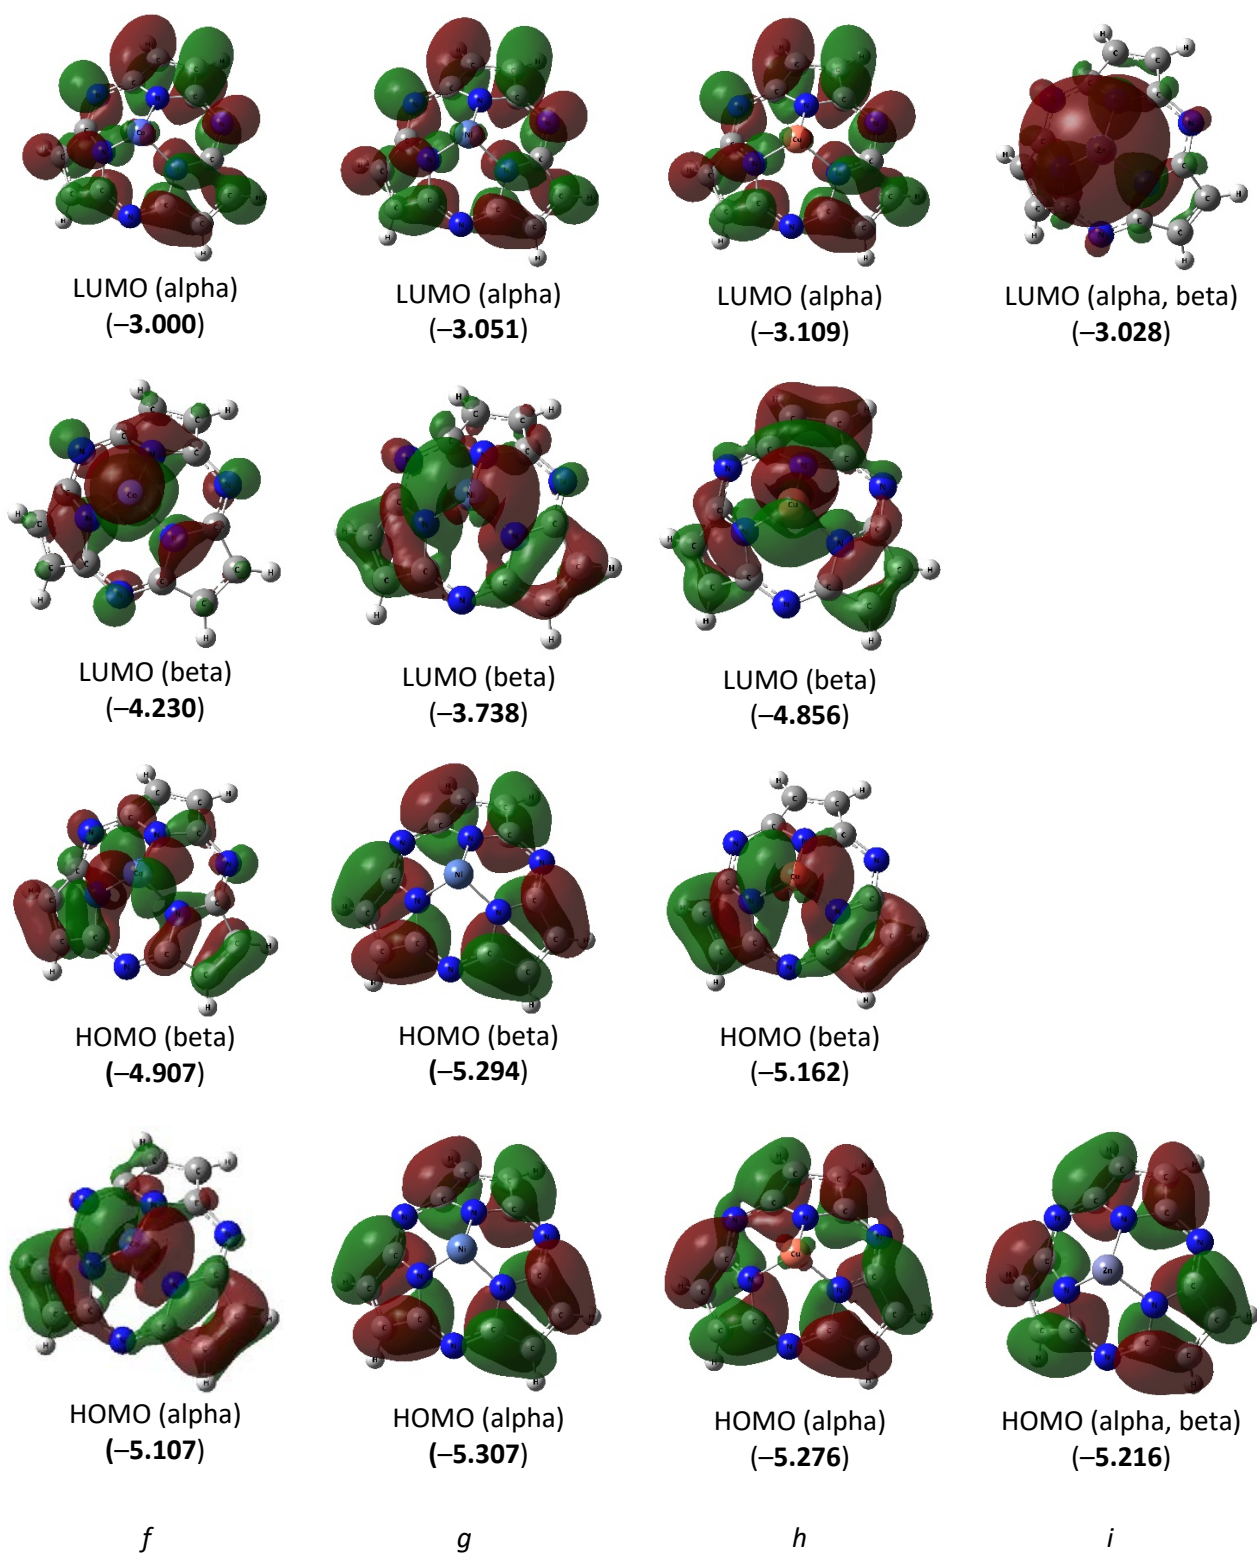

**Fig. S4, B.** Images of the highest occupied (HOMO) and lowest vacant (LUMO) molecular orbitals of complexes [CoSP] with  $M = 4$  (*f*), [NiSP] with  $M = 3$  (*g*), [CuSP] with  $M = 2$  (*h*), and [ZnSP] with  $M = 1$  (*i*) obtained within the DFT B3PW91/TZVP method. The energies values of the given MOs (in brackets) are expressed in eV. The symbol “alpha” belongs to electron having spin (+1/2), symbol “beta”, to electron having spin (-1/2).
